# A Data Driven Change-point Epidemic Model for Assessing the Impact of Large Gathering and Subsequent Movement Control Order on COVID-19 Spread in Malaysia

Sarat C. Dass<sup>1</sup>, Wai M. Kwok<sup>1</sup>, Gavin J. Gibson<sup>2</sup>, Balvinder S. Gill<sup>3</sup>,  
Bala M. Sundram<sup>3</sup> and Sarbhan Singh<sup>3</sup>

<sup>1</sup>School of Mathematical and Computer Sciences, Heriot-Watt University Malaysia

<sup>2</sup>School of Mathematical and Computer Sciences, Heriot-Watt University Edinburgh, UK

<sup>3</sup>Institute for Medical Research, Ministry of Health, Malaysia

## Abstract

The second wave of COVID-19 in Malaysia is largely attributed to a mass gathering held in Sri Petaling between February 27, 2020 and March 1, 2020, which contributed to an exponential rise of COVID-19 cases in the country. Starting March 18, 2020, the Malaysian government introduced four consecutive phases of a Movement Control Order (MCO) to stem the spread of COVID-19. The MCO was implemented through various non-pharmaceutical interventions (NPIs). The reported number of cases reached its peak by the first week of April and then started to reduce, hence proving the effectiveness of the MCO. To gain a quantitative understanding of the effect of MCO on the dynamics of COVID-19, this paper develops a class of mathematical models to capture the disease spread before and after MCO implementation in Malaysia. A heterogeneous variant of the Susceptible-Exposed-Infected-Recovered (SEIR) model is developed with additional compartments for asymptomatic transmission. Further, a change-point is incorporated to model the before and after disease dynamics, and is inferred based on data. Related statistical analyses for inference are developed in a Bayesian framework and are able to provide quantitative assessments of (1) the impact of the Sri Petaling gathering, and (2) the extent of decreasing transmission during the MCO period. The analysis here also quantitatively demonstrates how quickly transmission rates fall under effective NPI implementation within a short time period.

**Keywords:** COVID-19, Epidemic Models, Bayesian Inference, Movement Control Order, Large Gathering, Lockdown

# 1 Introduction

Imported cases from China contributed to the first COVID-19 wave in Malaysia from January 25, 2020 to February 26, 2020 [1]. This first wave had a total of 22 cases out of which 20 were directly linked to foreign travel while the remaining two cases were local transmissions [2, 3]. The second wave of COVID-19 in Malaysia was largely attributed to a mass gathering held in Sri Petaling between February 27, 2020 and March 1, 2020, which contributed to an exponential rise of COVID-19 cases in the country. This gathering involved over 16,000 participants including a large number of foreigners from countries that later registered COVID-19 cases [4]. On March 18, 2020, the Malaysian government introduced a nationwide lockdown which was the Phase I Movement Control Order (MCO) throughout the country to stem the spread of COVID-19. Phase 1 MCO was enforced for a 2-week period starting from March 18, 2020 to March 31, 2020. During this phase, various non-pharmaceutical interventions (NPIs) were strictly enforced by means of movement restrictions, wearing of face masks, social distancing and hand hygiene practices to reduce disease transmission. The Phase I MCO was then evaluated after 2 weeks based on case trends and model forecasts by the Ministry of Health (MOH) Malaysia. As local transmission persisted, the MCO was extended a total of four times until May 12, 2020. Phase 2, 3 and 4 of the MCO covered periods starting from April 1, 2020 until May 12, 2020 (Phase 2 - April 1, 2020 to April 14, 2020, Phase 3 - April 15th to April 30, 2020, and Phase 4 - May 1, 2020 to May 12, 2020). Subsequently, from May 4, 2020, the MCO was eased into the Conditional MCO (CMCO) until June 9, 2020. However, during CMCO, there were still several identified hot-spots of COVID-19 which were placed under Enhanced MCO (EMCO) with the aforementioned strict movement control restrictions.

The implementation of MCO proved to be effective - the reported COVID-19 cases reached its peak around the first week of April and subsequently started to reduce. However, concerns remained whether a rebound in transmission would occur when the MCO was lifted and if compliance to NPIs were not followed strictly at that time. In order to gain a quantitative understanding of the effect of MCO, we developed a class of mathematical models to capture the dynamics of COVID-19 spread before and after the MCO implementation. A variant of the Susceptible-Exposed-Infected-Recovered (SEIR) model is proposed and developed in this paper which incorporates heterogeneity in the transmission dynamics, additional compartments for asymptomatic transmission and a change-point, chosen adaptively based on data, to reflect the shift in spread dynamics after the MCO implementation. The models developed in this paper are able provide a quantitative assessment of the extent of COVID-19 spread during the pre-MCO (large

36 gathering) and MCO periods by means of a measure of infectivity developed from them.  
37 This measure is similar to the basic reproduction number, commonly denoted by  $\mathcal{R}_0$ , but  
38 can be calculated for more complex epidemic models such as the ones proposed here.

39 Deterministic compartmental models, such as the Susceptible-Infected-Recovered (SIR)  
40 or the Susceptible-Exposed-Infectious-Recovered (SEIR) models, provide a good theoretic-  
41 cal framework to study infectious disease spread, and have been widely used and reported  
42 in the literature. However, more complex versions of these models, and their stochas-  
43 tic counterparts require data-rich inputs to model all aspects of the disease dynamics.  
44 Data-rich inputs, if lacking, can be compensated using reliable and informative prior elic-  
45 itation. Considering the acute nature and scale of the pandemic as well as the urgent  
46 need for a multisectorial response, comprehensive data availability of the pandemic was  
47 limited in Malaysia. For example, the open source website `outbreak.my` initially reported  
48 a transmission network for all cases; however, it was unable to cope with the scale of the  
49 pandemic when it intensified. Factoring in this data limitation, we choose to develop  
50 models that are deterministic, rather than stochastic, while ensuring that they are able  
51 to capture salient transmission dynamics satisfactorily. As mentioned earlier, we enhance  
52 the deterministic models by incorporating compartments for asymptomatic transmission  
53 and a change-point to reflect the shift in disease dynamics. We also take into account  
54 heterogeneity in the disease spread such as varying contacts among susceptibles within  
55 the closed population. The starting point of our proposed models are the class of epidemic  
56 models with power transmission dynamics which are shown to incorporate heterogeneity  
57 (see [5, 6]).

58 Several studies in the literature [7, 8, 9, 10, 11] have analyzed the effects of NPIs in  
59 reducing the number of COVID-19 cases. In [7], the effects of different types of NPIs  
60 on COVID-19 cases are modeled using a negative-binomial distribution whose underlying  
61 parameters incorporate country information, type of NPI implemented and change-point  
62 effects. The associated Bayesian analysis is carried out using Markov Chain Monte Carlo  
63 (MCMC) algorithms to arrive at posterior parameter estimates and credible intervals.  
64 No epidemic models are considered in this work. A generalization of the SEIR epidemic  
65 model is considered in [9] to understand the dynamics of transmission in New York, USA,  
66 under various NPI settings. However, the model is complex and requires data-rich inputs  
67 for the estimation of all unknown parameters. As a result, the authors derive baseline  
68 epidemiological parameters from published literature and not from actual observed cases  
69 in New York, and in the end conduct a simulation study based on the assumed parameter  
70 values. The study in [8] extends the work of [12] and computes a time-varying basic  
71 reproduction number as a way of gauging the effect of NPIs over time. Both these works

72 assume that serial intervals (i.e., the time between onset of symptoms for the infector and  
73 the infectee) can be computed for each case, which is another situation requiring data-rich  
74 input.

75 Studies that use compartmental epidemic models as a way of gauging the time-varying  
76 effects of NPIs have emerged over the course of the pandemic [13, 14, 15]. Compartmental  
77 epidemic models naturally model disease spread via contact rates which directly quantify  
78 the extent of NPIs (since, as mentioned earlier, NPIs are designed to reduce person-to-  
79 person transmission). Thus, epidemic models provide a natural approach for considering  
80 time-varying effects of the MCO period. Further, in this paper, the estimation of SEIR  
81 parameters is carried out based on local considerations and local data; they are not  
82 obtained from published literature based on studies conducted elsewhere where their local  
83 dynamics can be vastly different.

84 We seek to address one important aspect of Malaysia’s multifaceted response to the  
85 COVID-19 pandemic, that is, to inform the health officials at MOH and aid them in their  
86 decision-making. Thus, our model was developed under local considerations using local  
87 data. Our model and related analyses are able to provide a quantitative assessment of (1)  
88 the impact of the Sri Petaling gathering, and (2) the extent of decreasing transmission  
89 during the MCO period by incorporating a time-varying contact rate parameter, which  
90 is estimated using locally available data. In essence, the proposed models here are being  
91 used as a lens to interpret the observed data in terms of when, and to what extent, a  
92 reduction in COVID-19 transmission occurred as result of the implementation of MCO.

93 The remainder of the paper is organized as follows: Section 2 presents the material and  
94 methods used in this paper: Section 2.1 gives the various data sources used in this study,  
95 Section 2.2 describes the epidemic models that we propose in this paper and Section 2.5  
96 outlines the related Bayesian inference methodology developments. Section 3 gives the  
97 results of our analyses, and Section 4 provides general discussion and insights derived  
98 from these results. Finally, several conclusions and potential future work are outlined in  
99 Section 5.

## 100 2 Methods

### 101 2.1 Data Collection

102 Daily situation reports on COVID-19 cases in Malaysia are published by the National  
103 Crisis Preparedness and Response Centre (CPRC) of MOH, as well as other official web-  
104 sites (such as [outbreak.my](https://www.outbreak.my)). The data on daily COVID-19 cases have been published

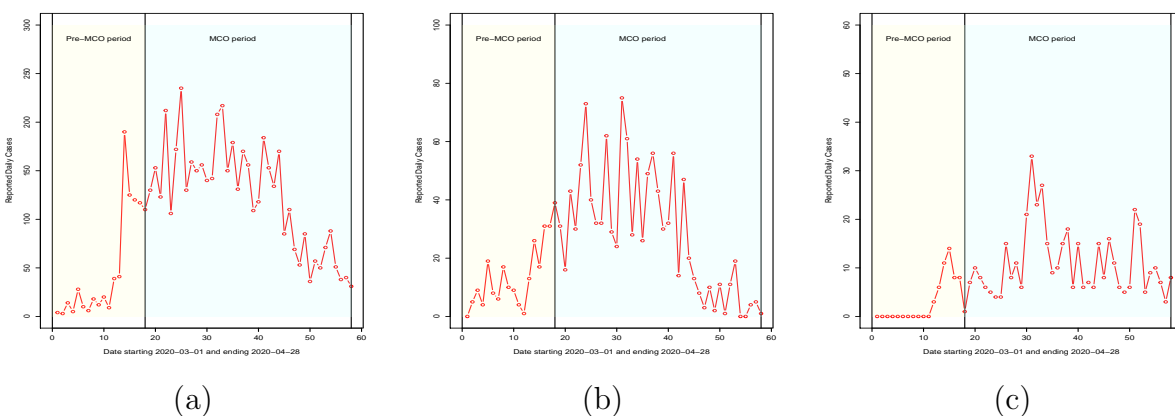

Figure 1: Reported daily cases for (a) Malaysia, (b) Selangor and (c) Sarawak. The time period considered is from March 1, 2020 to April 28, 2020.

105 since 21 January 2020 and is publicly available. The reports consist of confirmed daily  
106 and cumulative cases, recovered cases and deaths, as well as cases requiring ICU care  
107 and ventilator support. Cases by states are also available for the 13 states and 3 federal  
108 territories. In this study, we studied characteristics of the second COVID-19 wave in  
109 Malaysia starting from March 1, 2020 (corresponding to the final day of the Sri Petaling  
110 gathering). Data used for the current study are confirmed daily cases for Malaysia, and  
111 for two states: Selangor and Sarawak. These states were chosen to illustrate the aggres-  
112 sive transmission propagated by the Sri Petaling gathering. Selangor is the state where  
113 Sri Petaling is located and from where a majority of the participants originated, whereas  
114 Sarawak represents a state which was essentially not affected by this gathering. The time  
115 period of study is between March 1, 2020 (end of Sri Petaling gathering) and April 28,  
116 2020, covering the period immediately after the Sri Petaling gathering and the first three  
117 phases of the MCO. Our study duration is further divided into two periods. The first  
118 period ranges from March 1, 2020 until March 18, 2020, which covers the subsequent 17  
119 days after the gathering. The second period is taken from March 18, 2020 until April  
120 28, 2020, covering the three successive Phases 1, 2 and 3 of the MCO. Figure 1 gives the  
121 trajectories of reported daily COVID-19 cases between March 1, 2020 and April 28, 2020  
122 for Malaysia, and the states of Selangor and Sarawak.

123 All COVID-19 cases reported by MOH were confirmed by real-time reverse transcriptase-  
124 polymerase chain reaction (real-time RT-PCR) tests. A positive case was reported when  
125 the person in question was found to be positive for SARS-CoV-2 via a real-time RT-PCR  
126 test. Upon confirmation, the individual was isolated at COVID-19 designated hospitals  
127 and healthcare facilities. Active cases are defined as infected persons who were currently

128 undergoing treatment, and hence, isolated and removed; the individual is assumed to be  
129 unable to infect other susceptibles in the population, and hence “removed” from further  
130 modelling steps. This study did not consider transmission from positive isolated COVID-  
131 19 patients to health personnel as there was no evidence of this type of transmission  
132 occurring in the COVID-19 designated hospitals in Malaysia.

## 133 2.2 The SEIR model

134 The typical and well-known SEIR compartmental model consists of four compartments  
135 (Susceptible, Exposed, Infected and Recovered) representing different stages of evolution  
136 of an infectious disease, such as COVID-19, in a population. Susceptible individuals come  
137 in contact with one or more infected individuals in the population, and subsequently,  
138 become exposed to the virus. The virus then incubates within these individuals for some  
139 time. At the end of the incubation period, the exposed person becomes infectious and  
140 transmits the disease to other susceptibles in the population who come in close contact  
141 to him/her. The infected person is assumed to be infectious for a certain period (called  
142 the infectious period) after which the person recovers, dies or becomes immune. The  
143 deterministic SEIR model is given by a set of nonlinear ordinary differential equations  
144 (ODEs):

$$\dot{S}(t) = -h(S, I) \quad (1)$$

$$\dot{E}(t) = h(S, I) - \delta E(t) \quad (2)$$

$$\dot{I}(t) = \delta E(t) - \gamma I(t), \text{ and} \quad (3)$$

$$\dot{R}(t) = \gamma I(t) \quad (4)$$

where  $S(t)$ ,  $E(t)$ ,  $I(t)$  and  $R(t)$  represents, respectively, the susceptible, exposed, infected and recovered compartments representing the total number of individuals in each compartment at time  $t$  (here,  $\dot{x}(t)$  denotes the derivative of  $x(t)$  with respect to time  $t$  for  $x \in \{S, E, I, R\}$ ),  $N$  is the total population size, and  $h(S, I) = \beta \frac{S(t)}{N} I(t)$  is the rate of new infections (or, the number of new cases in the population). The parameters that govern the trajectory of the SEIR model are  $\theta \equiv (\beta, \delta, \gamma, i_0, e_0)$  which are, respectively, the transmission rate (i.e., number of individuals in the population an infected person comes in contact with and successfully transmits the disease per unit time), the rate of incubation of the disease, the rate of infectiousness, the initial number of infectives and the initial number of exposed individuals. Since  $\dot{S}(t) + \dot{E}(t) + \dot{I}(t) + \dot{R}(t) = 0$ , it follows that  $S(t) + E(t) + I(t) + R(t) = N$  for all  $t$ . Reparametrizing  $S(t) = S(t)/N$ ,  $E(t) = E(t)/N$ ,  $I(t) = I(t)/N$  and  $R(t) = R(t)/N$ , the renormalized versions of  $S$ ,  $E$ ,  $I$  and  $R$  represent

the proportion, rather than the total number of individuals, in each compartment. In the renormalized SEIR model,  $S(t) + E(t) + I(t) + R(t) = 1$  and the rate of new infections become

$$h(S, I) = \beta S I. \quad (5)$$

145 Based on initial values of  $S(0) \equiv s_0 = 1 - \frac{i_0}{N} - \frac{e_0}{N}$ ,  $E(0) = \frac{e_0}{N}$ ,  $I(0) = \frac{i_0}{N}$ , and  $R(0) = 0$   
146 at time  $T_0 = 0$ , the SEIR ODE system can be solved numerically to yield the values  
147 of  $S(t)$ ,  $E(t)$ ,  $I(t)$  and  $R(t)$  for every  $t \in [T_0, T_1]$  where  $T_1$  denotes the final time-point.  
148 In (1)-(4), the incubation period,  $1/\delta$ , is inversely proportional to the incubation rate  $\delta$ ,  
149 and similarly, the infectious period  $1/\gamma$  is inversely proportional to the infectious rate  $\gamma$ .  
150 The correspondence between rates and exponential sojourn times is only approximately so  
151 since it is not so straightforward to establish this correspondence with an individual-based  
152 stochastic model given the non-linear nature of the process.

153 Modifications to typical SEIR formulation (1)-(4) are made to adapt it to the local  
154 Malaysian context. Here, the last compartment of the SEIR model is not “Recovered”  
155 but “Removed”, representing all infectious individuals who are effectively isolated follow-  
156 ing a positive test result. In Malaysia, such patients are isolated in hospital wards to avoid  
157 further contacts with susceptibles. For COVID-19 in particular, the onset of symptoms  
158 does not necessarily indicate the start of infectiousness; in fact, the onset of infectiousness  
159 may be somewhat earlier. Thus, the infectious period  $1/\gamma$  represents the period of effec-  
160 tive infectiousness, that is, the period from the start of infectiousness (asymptomatic or  
161 symptomatic) until the individual is isolated and then can no longer infect others. Based  
162 on this understanding,  $1/\delta$  represents the incubation period, which is the period starting  
163 from getting infected until the onset of infectiousness. The connection between the SEIR  
164 modelling formulation and actual evolution stages of COVID-19 in patients is shown in  
165 Figure 2. Recent studies on COVID-19 have clearly reported growing evidence of asymp-  
166 tomatic infections [16, 17, 18] which the current SEIR model does not incorporate. We  
167 address the issue of asymptomatic transmission in our subsequent model development in  
168 Section 2.3.

169 Observed data in Malaysia consists of the total number of confirmed daily cases as  
170 reported by `outbreak.my` and CPRC (i.e., the number of cases that were tested positive,  
171 and hence, effectively isolated). Hence, only the  $R$  compartment of the SEIR model  
172 can be related to observed data while other compartments of the SEIR model remain  
173 unobserved. In the subsequent model development in Section 2.3, the  $R$  compartment is  
174 further split into two: observed and cryptic sub-compartments corresponding to reported  
175 and asymptomatic infections; see Section 2.3 for more details. An additional assumption  
176 made is that individuals from the  $R$  compartment do not return to the  $S$  compartment -

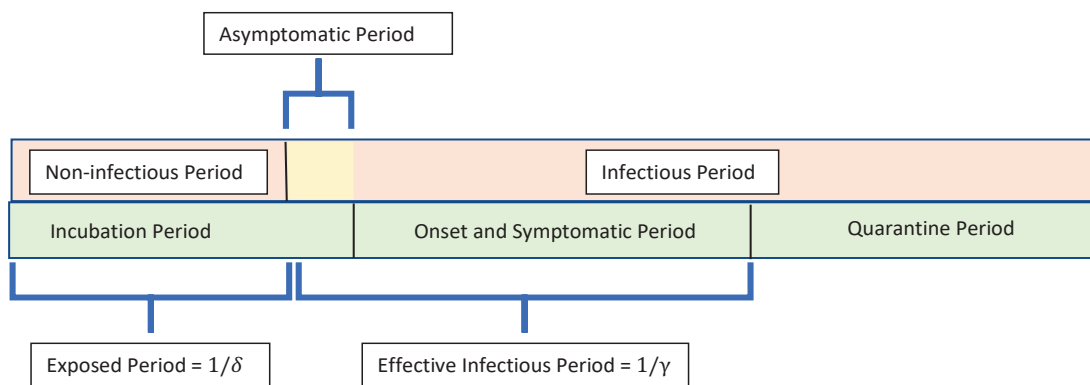

Figure 2: Salient periods in the evolution of COVID-19 and their connection to durations in the SEIR model.

177 at least on the timescales over which the epidemic is observed; see, for example, [19, 20]

178 In order to provide a quantitative assessment of the impact of the MCO, we modify  
 179 (1)-(4) to incorporate an instantaneous time-varying transmission rate,  $\beta \equiv \beta(t)$  (see [21],  
 180 for example) which is able to quantify the extent of disease transmission at time  $t$ . The  
 181 MCO can be deemed effective if the function  $\beta(t)$  shows a decay reflecting an increasing  
 182 effectiveness in reducing transmission among individuals over time due to implementation  
 183 of the NPIs.

### 184 2.3 The modified SEIR model

185 The aforementioned SEIR model does not account for heterogeneity, asymptomatic trans-  
 186 mission and change points. To this end, we propose models with power transmission dy-  
 187 namics that incorporate heterogeneity in the disease parameters; see, for example, [5, 6].  
 188 Further, the infectious compartment in (3) of the SEIR model is now split into two,  $I_o$   
 189 and  $I_c$ , for symptomatic (or, observed) and asymptomatic (or, cryptic) individuals, who,  
 190 respectively, exhibit and do not (or, mildly) exhibit symptoms but are nevertheless infec-  
 191 tious. Correspondingly, the  $R$  compartment is also split into two, as mentioned earlier, to  
 192 accomodate quarantined and un-quarantined cases. It is assumed that the proportion of  
 193 individuals transiting from  $E$  to  $I_o$  is  $p$ . The remaining exposed individuals (a proportion  
 194 of  $1 - p$ ) transition into the  $I_c$  compartment and remain undetected throughout their  
 195 disease experience.

196 From now on, we consider only renormalized state values which represent proportions,  
 197 and not actual numbers, of the population. The modified SEIR model with cryptic and



198 observed infectiousness is given by the following system of ODEs:

$$\dot{S}(t) = -h(S, I_o, I_c) \quad (6)$$

$$\dot{E}(t) = h(S, I_o, I_c) - \delta E(t) \quad (7)$$

$$\dot{I}_o(t) = p\delta E(t) - \gamma_o I_o(t) \quad (8)$$

$$\dot{R}_o(t) = \gamma_o I_o(t) \quad (9)$$

$$\dot{I}_c(t) = (1 - p)\delta E(t) - \gamma_c I_c(t) \quad (10)$$

$$\dot{R}_c(t) = \gamma_c I_c(t) \quad (11)$$

where the rate of new infections is now given by

$$h(S, I_o, I_c) = \left( \alpha + \beta_o(t) [I_o(t)]^{w_{i,o}} + \beta_c(t) [I_c(t)]^{w_{i,c}} \right) \cdot [S(t)]^{w_s} \quad (12)$$

199 as opposed to  $\beta S(t) I(t)$  in (5) for the SEIR model. A key difference of the model  
 200 formulation in (6) - (12) is the power transmission dynamics used to model heterogeneity  
 201 in the population; see [5, 6]. In [6], a gamma distribution is elicited on the varying  
 202 disease transmission parameters within the population which gives rise to the powers  $w_s$ ,  
 203  $w_{i,o}$  and  $w_{i,c}$  on  $S(t)$ ,  $I_o(t)$  and  $I_c(t)$ , respectively, with  $w_s \geq 1$ ,  $w_{i,o} \geq 1$  and  $w_{i,c} \geq 1$ .  
 204 The lower bounds on  $w_s$ ,  $w_{i,o}$  and  $w_{i,c}$  recover the original SEIR model dynamics with  
 205 no heterogeneity. The remaining parameters have the following interpretation: (1)  $\alpha$   
 206 represents a small yet significant force of infection that starts the local infection process  
 207 but is eventually overwhelmed by it. In our context,  $\alpha$  represents the initial force of  
 208 infection arising from, say, foreign infectious individuals attending the large gathering  
 209 at Sri Petaling starting February 27th. (2) The parameters  $\gamma_o$  and  $\gamma_c$  have the same  
 210 interpretation as  $\gamma$  in (3), that is, they are rates of infectiousness but for the observed and  
 211 cryptic compartments, respectively. (3) The parameter  $\delta$  is the same as before, namely, it  
 212 is the rate of incubation associated with the exposed compartment. (4) The parameters  
 213  $\beta_o$  and  $\beta_c$  are transmission rates for the observed and cryptic compartments, respectively,  
 214 in the modified SEIR model with  $\beta_c = \mu \beta_o$  and  $\mu \in [0, 1]$ . In other words, we assume that  
 215 the transmission rate for asymptomatic individuals is smaller than that of symptomatic  
 216 individuals; this is a plausible assumption to make as asymptomatic individuals generally  
 217 possess a lower viral load which leads to lower chances of a successful transmission. On  
 218 the other hand, a longer asymptomatic infectious period may compensate for the lower  
 219 transmission rates for an asymptomatic individual, and this possibility is captured by the  
 220 model via the parameter  $\gamma_c$ .

A change-point is incorporated into the modified SEIR model to capture the shift in  
 disease dynamics before and after the start of the MCO. For this, an unknown threshold,

$T^*$ , is chosen so that observed daily cases fall either to the left or right of  $T^*$ . We denote the observation window to the left of  $T^*$  by  $\mathcal{W}_L$  which consists of dates from March 1st up to and including  $T^*$ . The window to the right of  $T^*$  is denoted by  $\mathcal{W}_R$  which consists of dates after  $T^*$  up to and including April 28th, 2020. The change-point date  $T^*$  is inferred from data; it is not taken as March 18th, 2020, the date of the start of MCO. Choosing  $T^*$  in this data-driven way is justified as the impact of MCO on observed cases may not be realized immediately. The modified SEIR model with change-point  $T^*$  is governed by the ODE system (6)-(12) for all time points  $t \in \mathcal{W}_L$ . For  $t \in \mathcal{W}_R$ , the same ODE system (6)-(12) is considered but now with a different set of parameter values in  $\mathcal{W}_R$  compared to  $\mathcal{W}_L$ , and with a new  $\beta_o$  expressed as a function of  $t$ ,

$$\beta_o(t) = \gamma_o \left[ e^{a_0 + a_1(t - T^*)} + c [1 - e^{a_1(t - T^*)}] \right], \quad (13)$$

221 to model possible changes in disease transmission over time. The functional form of  $\beta_o(t)$   
 222 in (13) has an initial value of  $\gamma_o e^{a_0}$  at  $t = T^*$  after which it decreases (provided  $a_1 < 0$ )  
 223 to the asymptotic value of  $c\gamma_o$  as  $t \rightarrow \infty$ . Thus,  $c\gamma_o$  represents the residual disease  
 224 transmission that may be present even during the MCO period, for example, due to close  
 225 contact between family members in the same household. The general functional form of  
 226  $\beta_o(t)$  subsumes the constant disease transmission rate model as a special case by taking  
 227  $a_1 = c = 0$  in (13). The constant rate submodel has the advantage of not explicitly  
 228 assuming any functional form for the change in disease transmission over time. On the  
 229 other hand, it can only ascertain if there is an overall change (increase or decrease) in  
 230 transmission after the change point  $T^*$ . Similar to the relationship  $\beta_c = \mu\beta_o$  in  $\mathcal{W}_L$ , we  
 231 assume  $\beta_c(t) = \mu\beta_o(t)$  for the window  $\mathcal{W}_R$  based on a different  $\mu$  value. In Section 3, the  
 232 submodel is used first followed by the full model to fit to observed data.

233 In the model formulation of (6)-(11), only the  $R_o$  compartment is modelled directly  
 234 using a likelihood function based on daily observed cases. The other compartments of the  
 235 modified SEIR model remain latent and do not have any direct observation processes for  
 236 modelling based on likelihoods; see Section 2.5 for further details.

## 237 2.4 Quantitative assessment of disease spread

The basic reproduction number,  $\mathcal{R}_0$ , is defined as the number of secondary infections caused by one primary individual during his/her infectious period. It is the most important quantitative indicator reported to assess whether the disease is in control or not. It is well-known that the threshold value of 1 for  $\mathcal{R}_0$  distinguishes between the situations

where a major epidemic occurs versus the disease dying out eventually in the population. In fact, several studies in the literature report a gradual decrease in  $\mathcal{R}_0$  after lockdown [22, 23, 24]. For the SEIR model in (1) - (4),  $\mathcal{R}_0$  is given by the well-known formula  $\mathcal{R}_0 = \beta/\gamma$ . Time-varying measures of secondary infections per primary infected,  $\mathcal{R}_t$ , are also available in the literature. However, for the modified SEIR model presented in Section 2.3,  $\mathcal{R}_0$  and  $\mathcal{R}_t$  cannot be computed. Therefore, we resort to an alternative quantitative assessment of disease spread - the total number of infections (i.e., generational) caused by the introduction of one additional infectious individual into the infection process at time point  $t$ . This procedure is illustrated using the  $I_o$  compartment. Based on (6)-(12), new values for the ODE system are calculated from time point  $t$  onwards with current state values serving as initializations of the ODE system for all except one compartment: For the  $I_o$ -compartment, the current value  $I_o(t)$  is replaced by  $I_o(t) + 1/N$  as the initial value. The new rate of incidence is given by  $h(S^*, I_o^*, I_c^*)$  over the infectious period of the individual when the ODE system is propagated using (6)-(12) in  $[t, t + 1/\gamma_o]$ . The increase in the rate of incidence by the introduction of this individual in the  $I_o$  compartment is given by

$$\Delta_t(I_o) = \int_{[t, t + \frac{1}{\gamma_o}]} \left[ h\left(S^*(u), I_o^*(u), I_c^*(u)\right) - h\left(S(u), I_o(u), I_c(u)\right) \right] du. \quad (14)$$

Similarly, the increase in the rate of incidence by the introduction of one infectious individual into the  $I_c$  compartment at time point  $t$  can be calculated. This is denoted by  $\Delta_t(I_c)$ . The final increase in the incidence is the mixture

$$\Delta_t = p \Delta_t(I_o) + (1 - p) \Delta_t(I_c) \quad (15)$$

238 where  $p$  is the proportion of exposed individuals who enter the  $I_o$  compartment in (8).

## 239 2.5 Bayesian Inference

240 Model fitting and inference is carried out in a Bayesian framework.

### 241 2.5.1 The Likelihood

The likelihood relating components of the  $R_o$ -compartment to the total number of daily cases,  $D_t$ ,  $t \in \mathcal{W}_L \cup \mathcal{W}_R$ , is taken to be the negative binomial probability function, that is,

$$D_t \stackrel{\text{iid}}{\sim} NB(\cdot; \gamma_o I_o(t), \tau) \quad (16)$$

where

$$NB(x; \nu, \tau) = \frac{\Gamma(x+r)}{\Gamma(r)x!} q^r (1-q)^x, \quad x = 0, 1, 2, \dots \quad (17)$$

242 has mean  $\nu \equiv qr/(1-q)$  and variance  $qr/(1-q)^2 \equiv \nu + \tau\nu^2$ ; in (17),  $\Gamma(u)$  is the  
 243 Gamma function  $\int_{s=0}^{\infty} s^{u-1} e^{-s} ds$  evaluated for  $u > 0$ . Thus,  $r$  need not be integer-valued  
 244 in (17). The parameter  $\tau$  measures overdispersion with respect to the Poisson likelihood  
 245 recovered when  $\tau = 1$ ; see, for example, [25, 26]. The observed data on daily cases in  
 246 Malaysia exhibited significant overdispersion in the order of the mean. As a result, the  
 247 Poisson likelihood did not fit well and we resorted to the negative binomial likelihood  
 248 instead. More discussion on this aspect is presented later.

### 249 2.5.2 Assignment of Priors

250 Let  $\theta^{(j)} \equiv (\beta_o^{(j)}, \mu^{(j)}, \gamma_o^{(j)}, \gamma_c^{(j)}, \delta^{(j)}, p^{(j)}, w_{i,o}^{(j)}, w_{i,c}^{(j)}, w_s^{(j)}, \alpha^{(j)})$  for  $j = \{L, R\}$  be the param-  
 251 eters of the ODE system (6)-(12) for  $t \in \mathcal{W}_L$  and  $t \in \mathcal{W}_R$ , respectively. The collection  
 252 of all parameters is denoted by  $\Theta = \theta^{(L)} \cup \theta^{(R)} \cup (\tau, T^*)$  where  $\tau$  is the overdispersion  
 253 parameter of the negative binomial likelihood and  $T^*$  is the change-point. The uncer-  
 254 tainty in  $\theta$  is elicited via prior distributions in the Bayesian inferential framework. In  
 255 what follows, we describe the priors used on the generic parameter  $\theta$  after which the  
 256 discussion on prior elicitation can be extended to  $\theta^{(L)}$  and  $\theta^{(R)}$  in a straightforward man-  
 257 ner. It is important to note that the priors on  $\theta$  depend on hyperparameters. Here,  
 258 we only elicit the forms of the priors; the discussion on the exact choice of the corre-  
 259 sponding hyperparameters is relegated to the next few paragraphs. Independent uniform  
 260 priors  $U(a_{\xi_1}, b_{\xi_1})$  are chosen for each  $\xi_1 \in \{\mu, p, w_{i,o}, w_{i,c}, w_s, \alpha\}$  with corresponding hy-  
 261 perparameters  $a_{\xi_1}$  and  $b_{\xi_1}$ . The prior on  $(\gamma_o, \delta)$  is chosen independently in the following  
 262 way: For  $\xi_2 \in \{\gamma_o, \delta\}$ ,  $1/\xi_2 \sim U(a_{\xi_2}, b_{\xi_2})$ . The reciprocal transformation is used for prior  
 263 elicitation since these parameters have a rate interpretation, and hence, their reciprocals  
 264 represent the corresponding duration (either incubation or infectious periods) with bench-  
 265 mark values reported in the literature [16, 17, 18, 27]. The cryptic infectious period  $1/\gamma_c$   
 266 is generally longer than the observed infectious period  $1/\gamma_o$  (since the former remains  
 267 undetected). Hence, it follows that  $1/\gamma_o < 1/\gamma_c$ . This restriction can be incorporated into  
 268 the prior elicitation for  $1/\gamma_o$  and  $1/\gamma_c$  by first generating  $1/\gamma_o \sim U(a_{\gamma_o}, b_{\gamma_o})$  as above and  
 269 then setting  $1/\gamma_c = 1/\gamma_o + \xi_3$  where  $\xi_3 \sim U(a_{\xi_3} \equiv 0, b_{\xi_3} > 0)$ . The prior on the change  
 270 point  $T^*$  is taken to be uniform on dates from March 18th 2020 to March 31st 2020 both  
 271 inclusive. Since we define  $T^*$  as the number of days after March 1st 2020,  $T^* \sim U(17, 30)$ .  
 272 The prior on  $\tau$  is taken to be  $U(a_\tau, b_\tau)$  for the entire observation window  $\mathcal{W}_L \cup \mathcal{W}_R$ .

273 The prior on  $\beta_o$  is elicited indirectly via a reparametrization: For  $\mathcal{W}_L$ , we take  $\beta_o =$

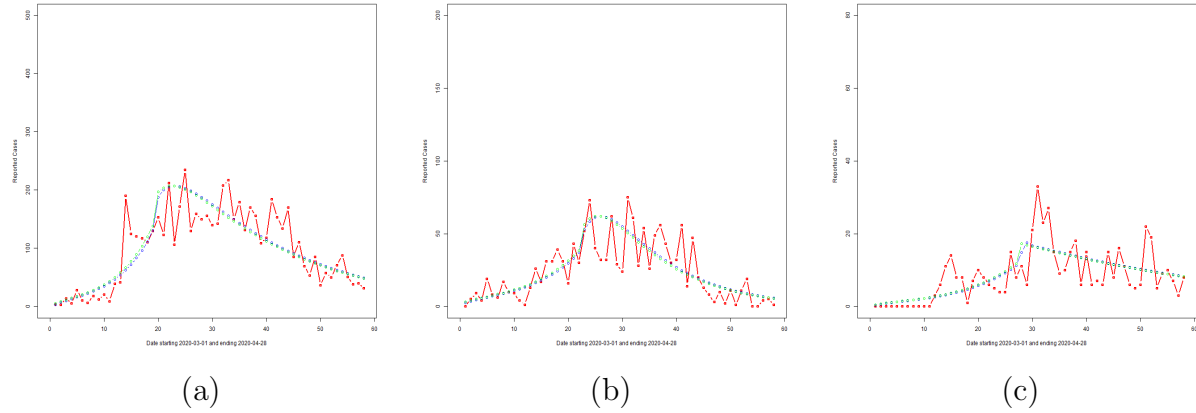

Figure 3: Reported daily cases (red line), and overlay plots of  $\Delta R_o(t)$  (blue line) and  $\gamma_o I_o(t)$  (green line) based on  $\hat{\Theta}_{MAP}$  for the constant rate submodel for (a) Malaysia, (b) Selangor and (c) Sarawak.

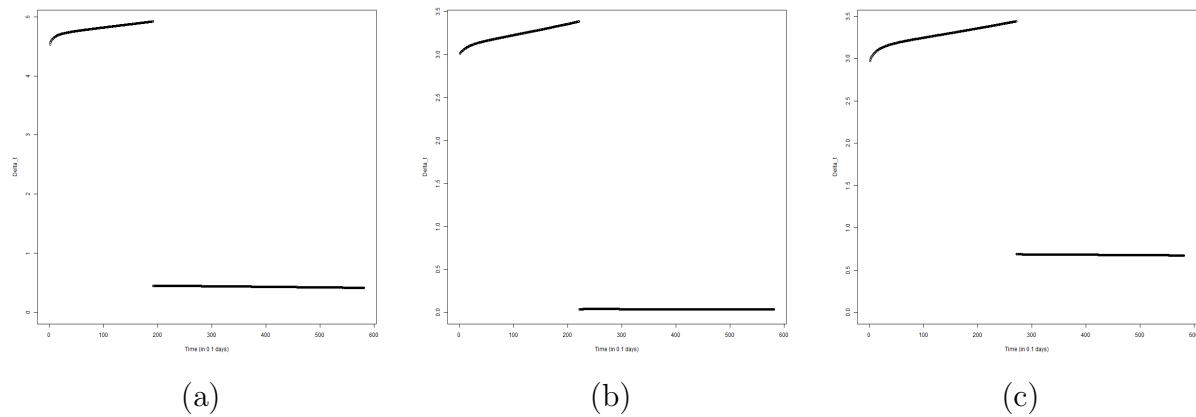

Figure 4: Plots of  $\Delta_t$  versus  $t$  for the constant rate submodel for (a) Malaysia, (b) Selangor and (c) Sarawak.

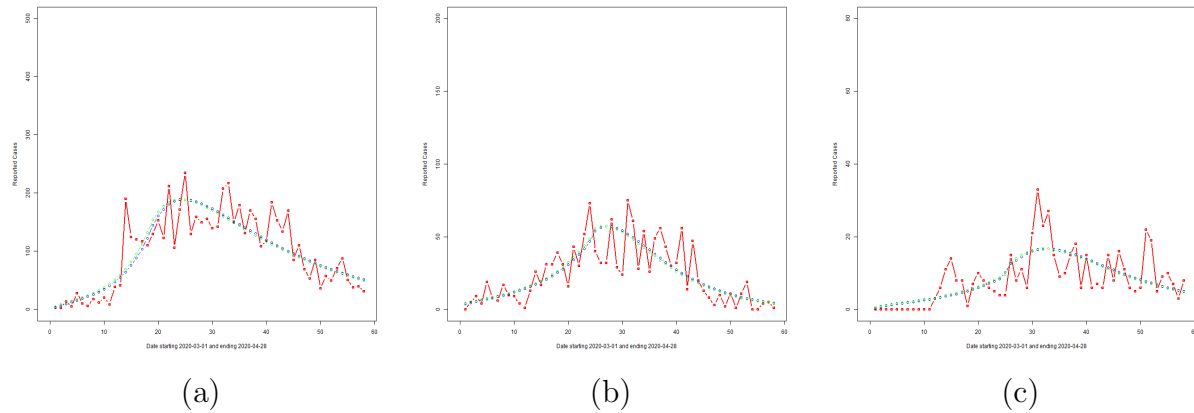

Figure 5: Reported daily cases (red line), and overlay plots of  $\Delta R_o(t)$  (blue line) and  $\gamma_o I_o(t)$  (green line) based on  $\hat{\Theta}_{MAP}$  for (a) Malaysia, (b) Selangor and (c) Sarawak.

274  $e^{a_0} \gamma_o$  and consider a uniform prior on  $a_0$ , independent of  $\gamma_o$ . Our prior elicitation adopts  
 275 this reparametrization for the following reason: For  $\beta_o = e^{a_0} \gamma_o$ , the basic reproduction  
 276 number  $\mathcal{R}_0 \equiv e^{a_0}$  is the more fundamental quantity for simpler models, such as the SIR  
 277 and SEIR models, compared to  $\beta_o$ . Thus,  $\mathcal{R}_0$  for these models can be benchmarked based  
 278 on similar flu-like epidemics in the past which, in turn, provide a suggested range of  
 279 values for the prior elicitation of  $a_0$  in  $W_L$ ; see [28]. Note that  $\beta_o$  which represents the  
 280 contact rate of the target population cannot be determined by direct observation. Hence,  
 281 putting a prior directly on  $\beta_o$  is difficult. Similarly, since  $1/\gamma_o$  is the observed infectious  
 282 period, benchmark values can be obtained from the literature for its prior elicitation. To  
 283 summarize, we put direct priors on parameters that have an epidemiological interpretation  
 284 and which can be benchmarked from reported literature for eliciting the appropriate prior.

285 For  $W_R$ ,  $\beta_o(t)$  has the form in (13) for coefficients  $a_0$ ,  $a_1$  and  $c$ . For  $a_0$ , we consider two  
 286 cases: When using the submodel to determine whether an overall reduction in transmission  
 287 occurs or not, we take  $a_0 \sim U(L_{a_0}, U_{a_0})$  with  $L_{a_0} < 0$  and  $U_{a_0} > 0$ . If the full model of (13)  
 288 is considered,  $a_0$  is chosen deterministically to ensure continuity of the infection process  
 289 before and after the change-point. More specifically,  $a_0$  in  $W_R$  is chosen so that the rate  
 290 of incidence  $h(S(t), I_o(t), I_c(t))$  in  $W_L$  and  $W_R$  coincide at  $t = T^*$ . For the full model,  $a_1$   
 291 is given a uniform prior with support on  $[L_{a_1}, U_{a_1}]$ . We take  $L_{a_1} < 0$  and  $U_{a_1} = 0$  if such  
 292 a reduction in disease transmission is established by the submodel.

293 Prior elicitation on parameters in  $W_R$  is based on convenience and ease of interpreta-  
 294 tion. It is easier to elicit priors on the components of  $\beta_o(t)$  in (13) compared to the entire  
 295 function itself. Further, the component parameters of  $\beta_o(t)$  satisfy restrictions that are  
 296 easy to understand; for example,  $c \leq e^{a_0}$  since  $c$  and  $e^{a_0}$  are the lower and upper bounds of

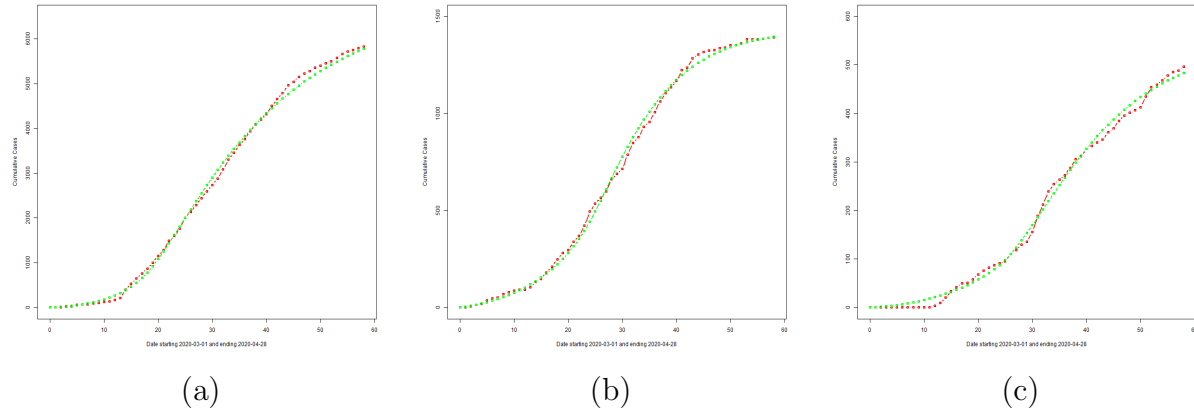

Figure 6: Reported cumulative cases (red line), and overlay plots of  $R_o(t)$  (green line) based on the MAP estimate for (a) Malaysia, (b) Selangor and (c) Sarawak.

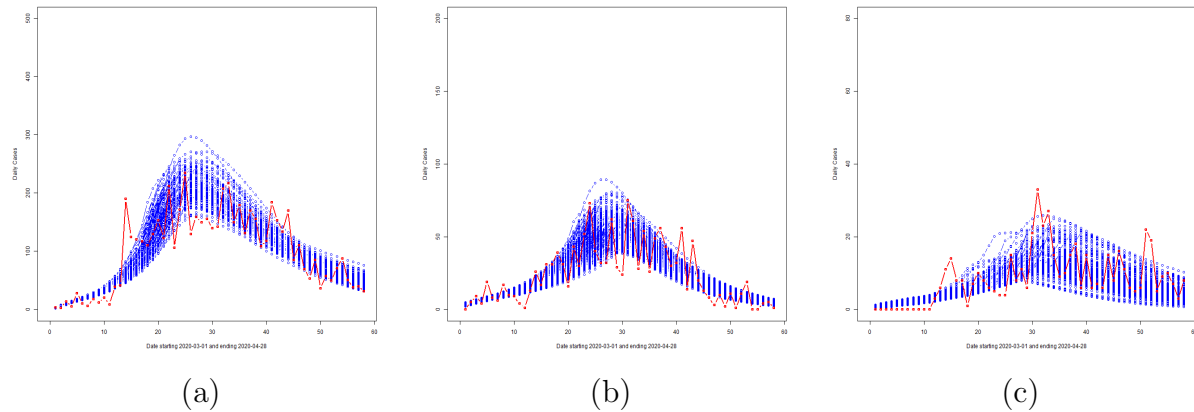

Figure 7: Illustration of the variability of  $\gamma_o I_o(t)$  from the posterior: Reported cumulative cases (red line), and overlay plots of  $\gamma_o I_o(t)$  for (a) Malaysia, (b) Selangor and (c) Sarawak.

297 the decay curve, respectively. Hence, a reasonable prior to put on  $c$  is  $U(0, e^{a_0})$ . The prior  
 298 elicitation on remaining unknown parameters are explained in detail in the Appendix.

### 299 2.5.3 Computational algorithm

300 Based on the negative binomial likelihood and prior elicitation in Sections 2.5.1 and 2.5.2,  
 301 respectively, the posterior of  $\Theta$  can be derived using Bayes theorem as

$$\begin{aligned} \pi(\Theta | \mathbf{D}) &\propto \prod_{t \in \mathcal{W}_L} NB(D_t; \gamma_o^{(L)} I_o^{(L)}(t), \tau) \cdot \prod_{t \in \mathcal{W}_R} NB(D_t; \gamma_o^{(R)} I_o^{(R)}(t), \tau) \cdot \pi(\Theta) \quad (18) \\ &= \mathbf{L}(\Theta) \cdot \pi(\Theta) \quad (19) \end{aligned}$$

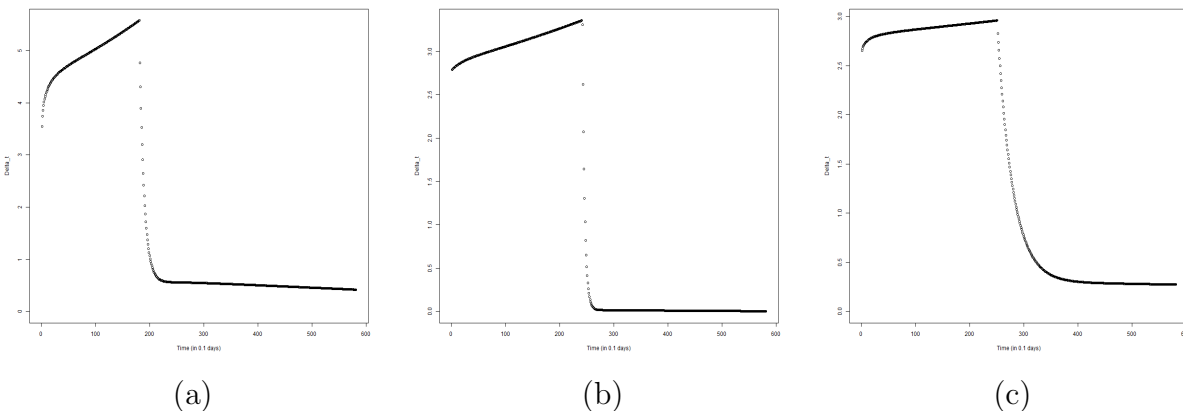

Figure 8: Plots of  $\Delta_t$  versus  $t$ : Malaysia (a), Selangor (b) and Sarawak (c).

where  $\mathbf{D} = \{D_t : t \in \mathcal{W}_L \cup \mathcal{W}_R\}$  is the collection of observed daily cases from March 1st until April 28, 2020,  $\mathbf{L}(\Theta)$  is the entire likelihood for  $\mathbf{D}$  and  $\pi(\Theta)$  is the prior on  $\Theta$  as described in Section 2.5.2. Bayesian inference is carried out using Monte Carlo importance sampling. A total of  $M$  samples,  $\Theta_i$  for  $i = 1, 2, \dots, M$ , are generated from the prior specification  $\pi(\Theta)$ . The likelihood,  $\mathbf{L}(\Theta_i)$ , is computed for each  $\Theta_i$  and normalized to obtain weights

$$w_i = \frac{\mathbf{L}(\Theta_i)}{\sum_{i=1}^M \mathbf{L}(\Theta_i)} \quad (20)$$

for  $i = 1, 2, \dots, M$ . To compute  $\mathbf{L}(\Theta_i)$ , one requires to numerically evaluate the solution of the ODE system (6)- (12). This is achieved using the `deSolve` package in R. The Bayesian computational algorithm described here is developed using R and the RStudio® user interface. Through this importance sampling step, an approximation to the Maximum-a-Posteriori (MAP) estimator of  $\Theta$  is given by

$$\hat{\Theta}_{MAP} = \arg \max_{\Theta} \pi(\Theta | \mathbf{D}) \approx \arg \max_{1 \leq i \leq M} w_i \pi(\Theta_i) \quad (21)$$

302 with the approximation becoming more accurate as  $M \rightarrow \infty$ . Resampling  $\Theta_i$ s with  
 303 weights  $w_i$  in (20) gives a ensemble of size  $M$ ,  $\{\Theta_i^*\}_{i=1}^M$ , from the target posterior  $\pi(\Theta | \mathbf{D})$   
 304 which can be used to provide a quantification of uncertainty around  $\hat{\Theta}_{MAP}$ .

### 305 3 Results

306 The study period is from March 1, 2020 until April 28, 2020 with  $T_0 = 0$  and  $T_1 = 59$ . The  
 307 impacts of the Sri Petaling gathering and MCO implementation are analyzed here using  
 308 the proposed model described in Section 2.3. Reported daily cases at the national level



| Country/State | Window          | Parameter    | MAP    | 95% Credible Interval |
|---------------|-----------------|--------------|--------|-----------------------|
| Malaysia      | $\mathcal{W}_L$ | $1/\gamma_o$ | 7.562  | (6.629, 8.203)        |
|               |                 | $1/\gamma_c$ | 8.153  | (6.961, 8.992)        |
|               |                 | $1/\delta$   | 7.594  | (6.357, 7.935)        |
|               |                 | $a_0$        | 2.861  | (1.713, 3.395)        |
|               |                 | $\mu$        | 0.640  | (0.250, 0.760)        |
|               |                 | $p$          | 0.690  | (0.538, 0.897)        |
|               | $\mathcal{W}_R$ | $1/\gamma_o$ | 7.289  | (6.094, 7.430)        |
|               |                 | $1/\gamma_c$ | 7.676  | (6.766, 9.230)        |
|               |                 | $1/\delta$   | 8.011  | (6.280, 8.224)        |
|               |                 | $a_1$        | -1.180 | (-2.414, -0.373)      |
|               |                 | $c$          | 6.522  | (1.309, 27.797)       |
|               |                 | $\mu$        | 0.686  | (0.067, 0.882)        |
|               |                 | $p$          | 0.605  | (0.479, 0.982)        |
|               | —               | $T^*$        | 18     | (17, 22)              |

Table 1: MAP estimates and associated credible intervals for Malaysia.

| Country/State | Window          | Parameter    | MAP    | 95% Credible Interval |
|---------------|-----------------|--------------|--------|-----------------------|
| Selangor      | $\mathcal{W}_L$ | $1/\gamma_o$ | 7.952  | (6.434, 8.320)        |
|               |                 | $1/\gamma_c$ | 8.611  | (6.826, 9.120)        |
|               |                 | $1/\delta$   | 6.747  | (5.615, 7.905)        |
|               |                 | $a_0$        | 2.041  | (1.296, 2.956)        |
|               |                 | $\mu$        | 0.468  | (0.211, 0.774)        |
|               |                 | $p$          | 0.785  | (0.519, 0.885)        |
|               | $\mathcal{W}_R$ | $1/\gamma_o$ | 7.342  | (6.100, 7.482)        |
|               |                 | $1/\gamma_c$ | 9.066  | (6.839, 9.099)        |
|               |                 | $1/\delta$   | 7.099  | (5.518, 8.033)        |
|               |                 | $a_1$        | -2.384 | (-2.953, -0.303)      |
|               |                 | $c$          | 4.037  | (0.144, 13.069)       |
|               |                 | $\mu$        | 0.374  | (0.177, 0.881)        |
|               |                 | $p$          | 0.708  | (0.486, 0.948)        |
|               | —               | $T^*$        | 22     | (17.5, 25)            |

Table 2: MAP estimates and associated credible intervals for Selangor.

| Country/State | Window          | Parameter    | MAP    | 95% Credible Interval |            |
|---------------|-----------------|--------------|--------|-----------------------|------------|
| Sarawak       | $\mathcal{W}_L$ | $1/\gamma_o$ | 8.947  | (6.647, 9.567)        |            |
|               |                 | $1/\gamma_c$ | 11.399 | (8.936, 14.138)       |            |
|               |                 | $1/\delta$   | 7.251  | (7.056, 7.972)        |            |
|               |                 | $a_0$        | 1.627  | (1.139, 2.618)        |            |
|               |                 | $\mu$        | 0.250  | (0.027, 0.879)        |            |
|               |                 | $p$          | 0.735  | (0.502, 0.979)        |            |
|               | $\mathcal{W}_R$ | $1/\gamma_o$ | 7.158  | (6.195, 7.954)        |            |
|               |                 | $1/\gamma_c$ | 11.364 | (8.993, 14.278)       |            |
|               |                 | $1/\delta$   | 7.648  | (6.910, 8.287)        |            |
|               |                 | $a_1$        | -0.354 | (-1.896, -0.099)      |            |
|               |                 | $c$          | 0.540  | (0.168, 2.705)        |            |
|               |                 | $\mu$        | 0.433  | (0.013, 0.988)        |            |
|               | —               | $T^*$        |        | 25                    | (18, 32.5) |

Table 3: MAP estimates and associated credible intervals for Sarawak.

309 as well as for Selangor and Sarawak are used for model fitting and parameter estimation.  
 310 Note that all states in Malaysia implemented MCO Phases 1-3 using the same guidelines  
 311 and protocols. Thus, one can gauge the impact of the Sri Petaling gathering on COVID-  
 312 19 spread in Malaysia based on a comparison between states and the national experience.  
 313 Here, Selangor and Sarawak are chosen as two such representative states with high and  
 314 low population densities, respectively.

315 First, we investigate if the MCO implementation had an overall effect of reducing  
 316 COVID-19 transmission rates. For this purpose, the constant rate submodel of (13) is  
 317 used and the prior on  $a_0$  in  $\mathcal{W}_R$  is chosen to be uniform with support on both positive  
 318 and negative values. The Bayesian inference methodology of Section 2.5 is carried out  
 319 with  $M^* = 50,000$  to obtain  $\hat{\Theta}_{MAP}$  and samples  $\Theta_i^*$  from the posterior of  $\Theta$  in (19). The  
 320 curves of  $\gamma_o I_o(t)$  and  $\Delta R_o(t) \equiv R_o(t) - R_o(t - 1)$  for each day  $t$  are obtained based on  
 321  $\hat{\Theta}_{MAP}$  and are displayed in Figure 3. This submodel captures broad features (increasing  
 322 and decreasing trends) of the reported cases trajectories in all three panels for Malaysia,  
 323 Selangor and Sarawak. To quantify the overall change in transmission before and after  
 324 MCO implementation,  $\Delta_t$  (see (15)) is obtained for  $t$  in  $\mathcal{W}_L$  and  $\mathcal{W}_R$ . The plots of  $\Delta_t$   
 325 versus  $t$  are shown in Figure 4. A consistent feature of the plots in all three panels is

326 that they first increase for time points  $t \leq T^*$  followed by a significant drop for  $t > T^*$ .  
327 Hence, we conclude that an exponential rise in cases occurred right after the completion  
328 of the Sri Petaling gathering on March 1st 2020, and the implementation of the MCO  
329 successfully stemmed the exponential rise at the national level, Selangor and Sarawak.

330 With reduced disease transmission established in  $\mathcal{W}_R$ , we next proceed to utilize the  
331 functional form (13) of  $\beta_o(t)$  as a quantitative model for transmission decay in  $\mathcal{W}_R$ .  
332 The Bayesian inference methodology of Section 2.5 is applied to the full model with  
333  $M^* = 50,000$  to obtain  $\hat{\Theta}_{MAP}$  and samples  $\Theta_i^*$  from the posterior of  $\Theta$  in (19). The  
334 curves of  $\gamma_o I_o(t)$  and  $\Delta R_o(t) \equiv R_o(t) - R_o(t-1)$  for each day  $t$  are obtained based  
335 on  $\hat{\Theta}_{MAP}$  and are displayed in Figure 5. Daily cumulative cases and the curve of  $R_o(t)$   
336 are displayed in Figure 6. We note from these figures that the proposed model captures  
337 broad features of the observed data and is an improvement over the constant rate sub-  
338 model. Uncertainty estimates are obtained for all unknown parameters in  $\Theta$  based on the  
339 ensemble  $\{\Theta_i^*\}_{i=1}^{M^*}$ . Variability estimates can be obtained for all parameters and their  
340 functions. As an illustration, we demonstrate the extent of variability inherent in the  
341 posterior visually for the expected  $R_o(t)$  curve given by  $\gamma_o I_o(t)$  (see (16)) for  $t \in [T_0, T_1]$ .  
342 This is displayed in Figure 7 which shows that most of the reported case numbers are  
343 well within the limits of variability of the posterior. Hence, the proposed model together  
344 with the negative binomial likelihood are able to explain the variability in the reported  
345 case numbers. However, there are a few exceptions, the most notable being the reported  
346 case number on Day 14 for Malaysia in Figure 7(a). We present an explanation for this  
347 outlying case later in the Discussion section.

348 Further results from the Bayesian analyses are summarized in Tables 1, 2 and 3. These  
349 tables give the MAP estimates of parameters and their corresponding 95% credible in-  
350 tervals for Malaysia, Selangor and Sarawak, respectively. We provide a summary of the  
351 salient findings here. The symptomatic and asymptomatic infectious periods as well as the  
352 incubation periods are found to be around 6-8 days for Malaysia, Selangor and Sarawak.  
353 These findings are similar to values reported in the literature for other countries; see,  
354 for example, [16, 17, 18, 27]. Change-points  $T^*$  are estimated not too far away from the  
355 date of MCO implementation, March 18th 2020. For Malaysia,  $T^* = 18$  is the MAP es-  
356 timate which corresponds to March 19th, 2020, and the associated 95% credible interval  
357 is (17, 21). For Selangor, the MAP estimate of  $T^*$  is  $T^* = 22$  with (17.5, 25) being the  
358 95% credible interval. For Sarawak, the transition date is less precise. The MAP estimate  
359 is  $T^* = 25$  (March 26th 2020) but the 95% credible interval (18, 32.5) is much larger  
360 indicating higher uncertainty in  $T^*$ . This can be attributed to the fact that the trajectory  
361 of reported case numbers for Sarawak shows a slower and more gradual increase, then

362 decrease, compared to Malaysia and Selangor (see Figure 5).

363 The plots of  $\Delta_t$  versus  $t$  for Malaysia, Selangor and Sarawak are provided in Figure  
364 8. We note that all three panels in Figure 8 indicate a decay in the transmission rates  
365 after  $T^*$ . The measure  $\Delta_t$  is calculated to be approximately 3.55 , 2.79 and 2.65 for  
366 Malaysia, Selangor and Sarawak, respectively, at the start of  $\mathcal{W}_L$ , that is, when  $t = T_0$ .  
367 Hence, Selangor achieved a rate of increase that is closer to the national level compared  
368 to Sarawak. Sarawak's cases increased but at a much slower rate compared to Selangor  
369 and Malaysia. Starting from  $t = T_0$ ,  $\Delta_t$  showed an increase in  $\mathcal{W}_L$ , reaching values of  
370 5.58, 3.35 and 2.96 at  $t = T^*$ , respectively, for Malaysia, Selangor and Sarawak. After  $T^*$ ,  
371  $\Delta_t$  for Malaysia, Selangor and Sarawak registered a decay demonstrating the effectiveness  
372 of the MCO.  $\Delta_t$  declined sharply to a value around 0.55, 0.01 and 0.37, respectively, for  
373 Malaysia, Selangor and Sarawak at  $t = T^* + 10$ , and after that, it declined more gradually  
374 to its corresponding asymptote. Based on  $\Delta_t$ , it is seen that the initial transmission rates  
375 tend to be higher for areas with a higher population density (comparing Selangor and  
376 Sarawak). On the other hand, based on the MAP estimates of  $a_1$  in  $\mathcal{W}_R$  of  $-2.38$  and  
377  $-0.35$  for Selangor and Sarawak, respectively (see Tables 2 and 3), higher population  
378 density areas also experience a faster decline in the transmission rates under an effective  
379 implementation of the MCO. Although the MAP estimate of  $a_1$  for Malaysia ( $a_1 = -1.18$   
380 from Table 1) is not as negative as it should be, we will show in the next section that a  
381 redistribution of cases further improves this estimate of  $a_1$  and brings it closer to that of  
382 Selangor (see Section 4 for the details).

## 383 4 Discussion on Reporting Delays, Case Redistribu- 384 tion and Overdispersed Likelihoods

385 Figure 7 indicates the presence of outliers that fall outside the limits of variability of the  
386 posterior. The most notable outlier is the total number of new cases reported on Day 14 for  
387 Malaysia. Generally speaking, such outliers highlight a mismatch between the proposed  
388 model and the observed data, and point towards model inadequacy. However, we wish  
389 to emphasize that this is not the case here. One key consideration is the effect of delay,  
390 that is, whether or not the reported case numbers coincide with the day of testing. It is  
391 highly likely that a lag occurred in the reporting of cases since the COVID-19 experience  
392 was new to Malaysia. Based on the report [29], it is reasonable to assume that delays in  
393 testing and reporting were expected during the initial days of the COVID-19 outbreak in  
394 Malaysia. The peak on Day 14 seem to suggest a significant backlog of reporting of cases.

395 The effects of reporting delays on observed case trajectories and parameter inference  
396 are illustrated here based on a simulation study. A delay-in-reporting model based  
397 on the multinomial distribution is assumed: Let  $X \sim Mult(D_t; p_1, p_2, \dots, p_K)$ , where  
398  $X = (X_1, X_2, \dots, X_K)$  with  $K = 5$  and  $X_k$  is the number of cases (out of the total re-  
399 ported cases on day  $t$ ,  $D_t$ ) that is to be redistributed to day  $t - k + 1$  for  $k = 1, 2, \dots, K$ .  
400 The probabilities  $p_k$ ,  $k = 1, 2, \dots, K$  are chosen according to a truncated geometric dis-  
401 tribution taking values in  $k - 1$  for  $k = 1, 2, \dots, K$  with success probability 0.4. The  
402 cases redistribution model is applied to new cases reported from Day 10 until Day 15.  
403 The redistributed reported case trajectory, the best fit curves and associated variabilities  
404 are shown in Figure 9. Comparing Figures 7(a) and 9(b), one can immediately notice that  
405 the reported case numbers in Figure 9(b) are better explained by the variabilities of the  
406 underlying model and the negative binomial likelihood. Parameter estimates and credible  
407 intervals for the redistributed case numbers are given in Table 4. We present the salient  
408 findings here. Comparing Tables 1 and 4, we find that estimates of the infectious (both  
409 symptomatic and asymptomatic) periods have now become shorter. This is expected and  
410 reasonable since the model and likelihood do not have to account for the sudden steep  
411 rise in cases on Day 14 by preferring a larger infectious period. Nevertheless, the new  
412 infectious periods are still within the 6-8 day range and are consistent with previously  
413 reported literature. The redistribution of case numbers have also reduced the uncertainty  
414 around the MAP value of  $T^* = 18$ : The credible interval for  $T^*$  in Table 4 is narrower  
415 compared to that in Table 1. The MAP estimate of  $a_1$  is now  $-2.075$ , which is closer to  
416 that of Selangor compared to Sarawak.

417 A final point to be discussed is our preference for the negative binomial likelihood  
418 compared to the more traditional Poisson likelihood for modelling COVID-19 case num-  
419 bers. Our initial investigation used the Poisson likelihood for reported case numbers but  
420 we found that the underlying model together with the Poisson likelihood was not able to  
421 capture inherent variabilities in the observed data. Hence, we opted for the overdispersed  
422 negative binomial likelihood which was able to satisfactorily represent the observed data  
423 via its overdispersion parameter  $\tau$ . This is evidenced by the variability bands presented  
424 in Figures 7 and 9(b) which successfully enclose most of the reported case numbers. This  
425 coverage is further improved in Figure 9(b) by a redistribution of delayed cases. We also  
426 provide the loglikelihood values corresponding to the Poisson and negative binomial ob-  
427 servation models in Table 5 for Malaysia (with original case numbers), Malaysia (with  
428 redistributed case numbers), Selangor and Sarawak. Note that the negative binomial log-  
429 likelihood values are consistently larger than the Poisson counterparts indicating a better  
430 model fit to observed data.

| Country/State | Window          | Parameter    | MAP    | 95% Credible Interval |
|---------------|-----------------|--------------|--------|-----------------------|
| Malaysia      | $\mathcal{W}_L$ | $1/\gamma_o$ | 7.121  | (6.330, 8.223)        |
|               |                 | $1/\gamma_c$ | 7.694  | (6.829, 8.993)        |
|               |                 | $1/\delta$   | 7.379  | (6.211, 7.954)        |
|               |                 | $a_0$        | 3.018  | (1.643, 3.451)        |
|               |                 | $\mu$        | 0.709  | (0.218, 0.778)        |
|               |                 | $p$          | 0.810  | (0.545, 0.892)        |
|               | $\mathcal{W}_R$ | $1/\gamma_o$ | 6.821  | (6.058, 7.452)        |
|               |                 | $1/\gamma_c$ | 7.322  | (6.652, 8.921)        |
|               |                 | $1/\delta$   | 7.074  | (5.959, 8.195)        |
|               |                 | $a_1$        | -2.075 | (-2.888, -0.476)      |
|               |                 | $c$          | 8.438  | (0.675, 29.336)       |
|               |                 | $\mu$        | 0.621  | (0.105, 0.807)        |
|               | —               | $T^*$        |        | 18                    |

Table 4: Summary results for Malaysia (with redistributed cases).

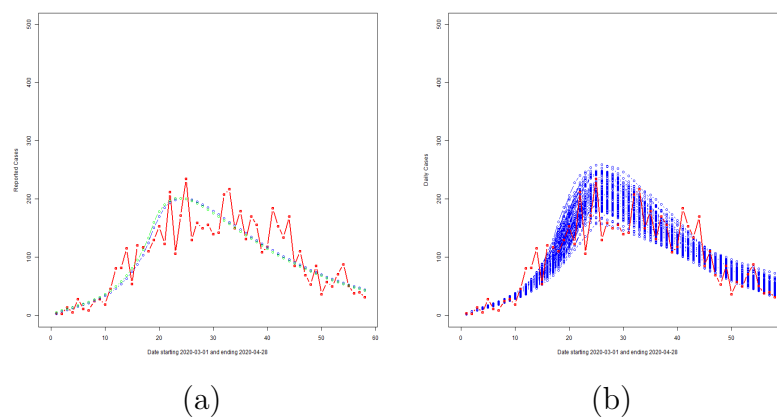

Figure 9: Effect of redistribution: Panel (a) shows the redistributed daily cases and the corresponding best fit curves of  $\gamma_o I_o(t)$  (blue line) and  $\Delta R_o(t)$  (green line) based on  $\hat{\Theta}_{MAP}$ . Panel (b) shows the variability of the fit based on the ensemble set  $\{\Theta_i^*\}_{i=1}^M$ .

| Country/State            | Distribution      | Log-likelihood values |
|--------------------------|-------------------|-----------------------|
| Malaysia                 | Negative Binomial | -254.68               |
|                          | Poisson           | -490.42               |
| Malaysia (redistributed) | Negative Binomial | -245.66               |
|                          | Poisson           | -417.66               |
| Selangor                 | Negative Binomial | -191.41               |
|                          | Poisson           | -276.06               |
| Sarawak                  | Negative Binomial | -136.30               |
|                          | Poisson           | -162.12               |

Table 5: Loglikelihood values of the NB and Poisson likelihoods.

## 5 Conclusion

Quantitative models and assessment of the impacts of the Sri Petaling gathering and implementation of MCO on COVID-19 spread in Malaysia are developed in this paper. The MCO implementation is found to be highly effective in containing (an exponential rise of) the COVID-19 outbreak in Malaysia. The analysis here quantitatively demonstrates how quickly transmission rates fall under effective NPI implementation within a short time period. Higher disease transmission is found in Selangor (a state with higher population density) compared to Sarawak. We also found that under MCO, the decline in transmission was faster in Selangor compared to Sarawak. The rise and fall of disease transmission in Selangor mirrored the national level whereas Sarawak showed a more gradual increase and decrease in COVID-19 transmission. The change points were mostly found to be close to the date of MCO implementation (18th March 2020) although Sarawak exhibited a larger uncertainty around that date due to its gradual and slower increasing and decreasing trends of reported case numbers. Our study developed a new model to represent COVID-19 spread in Malaysia that accounts for heterogeneity and asymptomatic transmissions. We found that reported case numbers in Malaysia exhibited large variabilities which can possibly be attributed to a delay in reporting, particularly during the early stages of the pandemic as the experience with handling COVID-19 was new to the country. Nevertheless, the model developed here together with the overdispersed negative binomial likelihood are able to capture salient features of COVID-19 spread in Malaysia and provide reliable quantitative assessments even under the challenges of limited and delayed data.

## 453 Acknowledgment

454 The authors would like to acknowledge the Global Challenges Research Fund (GCRF)  
455 “Post MCO Strategies for Controlling Covid-19 in Malaysia” by the Scottish Funding  
456 Council and Heriot-Watt University. The authors declare no conflicts of interest. The  
457 authors would also like to thank the Director General of Health Malaysia for his permission  
458 to publish this article.

## 459 Appendix: Prior Elicitation on Remaining Parameters

460 We describe the prior elicitation for the initial number of infectious and exposed individ-  
461 uals,  $i_0$  and  $e_0$ , respectively, relevant only for  $\mathcal{W}_L$ . Conditional on  $\delta$  and  $\gamma_o$ ,  $i_0$  (corre-  
462 sponding to observed, not cryptic) is given the prior elicitation  $\pi(i_0 | \gamma_o, \delta) = U(m_{i_0} -$   
463  $\Delta_{i_0}, m_{i_0} + \Delta_{i_0})$  for some  $m_{i_0}$  and  $\Delta_{i_0}$ . This prior,  $\pi(i_0 | \gamma_o, \delta)$ , on  $i_0$  is motivated from  
464 (9) based on the differential equation for the  $R_o$  compartment. Note that  $\dot{R}_o(t) = \gamma_o I_o(t)$   
465 from (9), and hence,  $i_0 = \dot{R}_o(0)/\gamma_o$ . To obtain an estimate of  $\dot{R}_o(0)$ , a second order  
466 polynomial is fitted using least squares to the trajectory of cumulative cases in a window  
467 of  $m \geq 3$  days starting from  $T_0 \equiv 0$ .  $\dot{R}_o(0)$  is then estimated by  $\dot{P}(0)$  where  $\dot{P}(t)$  is the  
468 first derivative of the fitted polynomial,  $P(t)$ . The mean of the uniform distribution on  $i_0$   
469 is taken to be  $m_{i_0} = \dot{P}(0)/\gamma_o$ . The initial number of exposed individuals,  $e_0$ , is given the  
470 prior elicitation  $\pi(e_0 | \gamma_o, \delta, p) = U(m_{e_0} - \Delta_{e_0}, m_{e_0} + \Delta_{e_0})$  for some  $m_{e_0}$  and  $\Delta_{e_0}$ . To find  
471 an expression for  $m_{e_0}$ , we rewrite (8) and note that  $e_0 = (\dot{I}_o(0) + \gamma_o I_o(0))/(p\delta)$ . Next,  
472 substituting  $\dot{P}(0)/\gamma_o$  for  $I_o(0)$ , the mean of the uniform distribution on  $e_0$  is taken as  
473  $m_{e_0} = (\ddot{P}(0) + \gamma_o \dot{P}(0))/(\gamma_o p \delta)$  where  $\ddot{P}(t)$  is the second derivative of  $P(t)$  with respect  
474 to  $t$ . The half-widths for both priors on  $i_0$  and  $e_0$  are taken as  $\Delta_{i_0} = \Delta_{e_0} = 5$ . Thus, the  
475 initial prior distributions on  $i_0$  and  $e_0$  are based on the number of infectives and exposed  
476 in the original population; so they are un-normalized. This is because their estimates  
477 are calculated from reported case data. But these estimates are later normalized by the  
478 population size for input into the SIER and modified SEIR models.

479 The hyperparameters  $a_\xi$  and  $b_\xi$  for  $\xi \in \{\mu, \gamma_o, \gamma_c, \delta, p, w_{i,o}, w_{i,c}, w_s, \alpha\}$  are chosen based  
480 on values reported in previous studies where available. For example, the incubation  
481 period, defined as the period from being infected by COVID-19 to the onset of symptoms,  
482 is typically reported to be between 6 and 8 days on average [30]. Hence, we take  $a_\delta = 6$   
483 and  $b_\delta = 8$  for the prior elicitation of  $1/\delta$ . For the infectious period, we consider  $a_{\gamma_o} = 6$   
484 and  $b_{\gamma_o} = 8$  to encompass corresponding values available from the literature; see, for  
485 example, [16, 17, 18, 27]. The values of parameters reported in the literature are only



486 taken as starting points.

## 487 References

- 488 [1] Kementerian Kesehatan Malaysia, [KPK Press Statement 25 January 2020 - Detection](#)  
489 [of A New Case Infected by The 2019 Novel Coronavirus \(2019-nCoV\) in Malaysia,](#)  
490 [Press Release \(2020\).](#)  
491 [URL <https://kpk.kesihatan.gov.my/2020/01/25/kenyataan-akhbar-kpk-25-januari-2020-pengesanan-kes-baharu-yang-disahkan-dijangkiti-2019-novel-coronavirus-2019-ncov-di-malaysia/>](https://kpk.kesihatan.gov.my/2020/01/25/kenyataan-akhbar-kpk-25-januari-2020-pengesanan-kes-baharu-yang-disahkan-dijangkiti-2019-novel-coronavirus-2019-ncov-di-malaysia/)  
493
- 494 [2] Kementerian Kesehatan Malaysia, [KPK Press Statement 25 February 2020 - The](#)  
495 [Latest Situation of the Coronavirus Disease 2019 \(COVID-19\) Infection in Malaysia,](#)  
496 [Accessed: 2020-05-21 \(2020\).](#)  
497 [URL <https://kpk.kesihatan.gov.my/2020/02/25/kenyataan-akhbar-kpk-25-februari-2020-situasi-terkini-jangkitan-coronavirus-disease-2019-covid-19-di-malaysia/>](https://kpk.kesihatan.gov.my/2020/02/25/kenyataan-akhbar-kpk-25-februari-2020-situasi-terkini-jangkitan-coronavirus-disease-2019-covid-19-di-malaysia/)  
499
- 500 [3] Kementerian Kesehatan Malaysia, [KPK Press Statement 27 February 2020 - the](#)  
501 [Latest Situation of the Coronavirus Disease 2019 \(COVID-19\) Infection in Malaysia,](#)  
502 [Accessed: 2020-02-27 \(February 2020\).](#)  
503 [URL <https://kpk.kesihatan.gov.my/2020/02/27/kenyataan-akhbar-kpk-27-februari-2020-situasi-terkini-jangkitan-coronavirus-disease-covid-19-di-malaysia/>](https://kpk.kesihatan.gov.my/2020/02/27/kenyataan-akhbar-kpk-27-februari-2020-situasi-terkini-jangkitan-coronavirus-disease-covid-19-di-malaysia/)  
505
- 506 [4] V. Babulal, N. Z. Othman, Sri Petaling Tabligh gathering remains Msia's largest  
507 Covid-19 cluster, *New Straits Times* (2020).
- 508 [5] A. S. Novozhilov, [On the spread of epidemics in a closed heterogeneous population,](#)  
509 [Math. Biosci. 215 \(2\) \(2008\) 177–185.](#)  
510 [URL <https://www.ncbi.nlm.nih.gov/pmc/articles/PMC2580825/>](https://www.ncbi.nlm.nih.gov/pmc/articles/PMC2580825/)
- 511 [6] A. S. Novozhilov, [Epidemiological Models with Parametric Heterogeneity : De-](#)  
512 [terministic Theory for Closed Populations,](#) *Mathematical Modelling of Natural*  
513 *Phenomena* 7 (3) (2012) 147–167.  
514 [URL <https://www.cambridge.org/core/journals/mathematical-modelling-of-natural-phenomena/article/epidemiological-models-with-parametric->](https://www.cambridge.org/core/journals/mathematical-modelling-of-natural-phenomena/article/epidemiological-models-with-parametric-)  
515

- 516 [heterogeneity - deterministic - theory - for - closed - populations /](https://doi.org/10.1101/2020.11.20.20233890)  
517 [87C0DA28F1DC79BF69F0384COBF5AE8B](https://doi.org/10.1101/2020.11.20.20233890)
- 518 [7] N. Banholzera, E. van Weenena, B. Kratzwalda, A. Seeliger, D. Tschernuttera,  
519 P. Bottrighia, A. Cenedesea, J. P. Sallesa, W. Vachy, S. Feuerriegely, [The estimated](#)  
520 [impact of non-pharmaceutical interventions on documented cases of COVID-19: A](#)  
521 [cross-country analysis](#), medRxiv (2020).  
522 URL <https://www.medrxiv.org/content/10.1101/2020.04.16.20062141v3>
- 523 [8] B. J. Cowling, S. T. Ali, T. W. Y. Ng, T. K. Tsang, J. C. M. Li, M. W. Fong, Q. Liao,  
524 M. Y. Kwan, S. L. Lee, S. S. Chiu, J. T. Wu, P. Wu, G. M. Leung, [Impact assessment](#)  
525 [of non-pharmaceutical interventions against coronavirus disease 2019 and influenza](#)  
526 [in Hong Kong: an observational study](#), Lancet Public Health 5 (2020) 279–88.  
527 URL [https://doi.org/10.1016/S2468-2667\(20\)30090-6](https://doi.org/10.1016/S2468-2667(20)30090-6)
- 528 [9] C. N. Ngonghala, E. Iboi, S. Eikenberry, M. Scotch, C. R. MacIntyre, M. H.  
529 Bonds, A. B. Gumel, [Mathematical assessment of the impact of non-pharmaceutical](#)  
530 [interventions on curtailing the 2019 novel Coronavirus](#), Mathematical Biosciences  
531 325 (2020) 1–15.  
532 URL <https://www.sciencedirect.com/science/article/pii/S0025556420300560?via%3Dihub>  
533
- 534 [10] N. Imai, K. A. Gaythorpe, S. Abbott, S. Bhatia, S. van Elsland and Kiesha Prem,  
535 Y. Liu, N. M. Ferguson, [Adoption and impact of non-pharmaceutical interventions](#)  
536 [for COVID-19](#), Wellcome Open Research (2020).  
537 URL <https://doi.org/10.12688/wellcomeopenres.15808.1>
- 538 [11] M. de Figueiredo, D. Codina, M. M. Figueiredo, S. M, C. León, [Impact of lockdown](#)  
539 [on COVID-19 incidence and mortality in China: an interrupted time series study](#),  
540 Bull World Health Organ [Submitted] (2020).  
541 URL <http://dx.doi.org/10.2471/BLT.20.256701>
- 542 [12] R. Thompsona, J. Stockwind, R. van Gaalene, J. Polonskyf, Z. Kamvarg, P. De-  
543 marshh, E. Dahlqwist, S. Lij, E. Miguelk, T. Jombartg, J. Lesslerm, S. Cauchemezn,  
544 A. Corig, [Improved inference of time-varying reproduction numbers during infectious](#)  
545 [disease outbreaks](#), Epidemics 29 (2019).  
546 URL <https://www.sciencedirect.com/science/article/pii/S1755436519300350?via%3Dihub>  
547

- 548 [13] A. Al Wahaibi, A. Al Manji, A. Al Maani, B. Al Rawahi, K. Al Harthy, F. Alyaquobi,  
549 A. Al-Jardani, E. Petersen, S. Al Abri, **Covid-19 epidemic monitoring after non-**  
550 **pharmaceutical interventions: The use of time-varying reproduction number in a**  
551 **country with a large migrant population**, International Journal of Infectious Diseases  
552 99 (2020) 466–472.  
553 URL <https://www.sciencedirect.com/science/article/pii/S1201971220306688>  
554
- 555 [14] G. Giordano, F. Blanchini, R. Bruno, P. Colaneri, A. Di Filippo, A. Di Matteo,  
556 M. Colaneri, **Modelling the COVID-19 epidemic and implementation of population-**  
557 **wide interventions in Italy**, Nature Medicine (2020) 1–6.  
558 URL <https://www.nature.com/articles/s41591-020-0883-7?fbclid=IwAR156A0apdnJ9R8QG4s5od1VrQgA9nhbQV70U1KDttNw4Pq7Y860hRd54B4>  
559
- 560 [15] F.-C. Hu, **The Estimated Time-Varying Reproduction Numbers during the Ongoing**  
561 **Pandemic of the Coronavirus Disease 2019 (COVID-19) in 12 Selected Countries**  
562 **outside China**, medRxiv (2020).  
563 URL <https://www.medrxiv.org/content/10.1101/2020.05.10.20097154v1.full.pdf>  
564
- 565 [16] P. Yu, J. Zhu, Z. Zhang, Y. Han, **A Familial Cluster of Infection Associated With the**  
566 **2019 Novel Coronavirus Indicating Possible Person-to-Person Transmission During**  
567 **the Incubation Period**, The Journal of Infectious Diseases 221 (11) (2020) 1757–1761.  
568 URL <https://academic.oup.com/jid/article/221/11/1757/5739751>
- 569 [17] W. E. Wei, Z. Li, C. J. Chiew, S. E. Yong, M. P. Toh, V. J. Lee, **Presymptomatic**  
570 **Transmission of SARS-CoV-2 - Singapore, January 23 - March 16, 2020**, MMWR  
571 Morb Mortal Wkly Rep 2020 69 (2020) 411–415.  
572 URL [https://www.cdc.gov/mmwr/volumes/69/wr/mm6914e1.htm?s\\_cid=mm6914e1\\_w](https://www.cdc.gov/mmwr/volumes/69/wr/mm6914e1.htm?s_cid=mm6914e1_w)  
573
- 574 [18] A. Kimball, K. Hatfield, M. Arons, A. James, J. Taylor, K. Spicer, A. C. Bardossy,  
575 L. P. Oakley, S. Tanwar, Z. Chisty, J. M. Bell, M. Methner, J. Harney, J. R. Jacobs,  
576 C. M. Carlson, H. P. McLaughlin, N. Stone, S. Clark, C. Brostrom-Smtih, L. C. Page,  
577 M. Kay, J. Lewis, D. Russell, B. Hiatt, J. Gant, J. S. Duchin, T. A. Clark, M. A.  
578 Honein, S. C. Reddy, J. A. Jernigan, **Asymptomatic and Presymptomatic SARS-**  
579 **CoV-2 Infections in Residents of a Long-Term Care Skilled Nursing Facility — King**  
580 **County, Washington, March 2020**, MMWR Morb Mortal Wkly Rep 2020 69 (2020)

- 581 377–381.  
582 URL <https://www.cdc.gov/mmwr/volumes/69/wr/mm6913e1.htm>
- 583 [19] J. C. Blackwood, L. M. Childs, [An introduction to compartmental modeling for the](#)  
584 [budding infectious disease modeler](#), *Letters in Biomathematics* 5 (1) (2018) 195–221.  
585 URL [https://lettersinbiomath.journals.publicknowledgeproject.org/](https://lettersinbiomath.journals.publicknowledgeproject.org/index.php/lib/article/view/81/59)  
586 [index.php/lib/article/view/81/59](#)
- 587 [20] W. O. Kermack, A. G. McKendrick, [A contribution to the mathematical theory of](#)  
588 [epidemics](#), *Proceedings of the Royal Society of London Series A containing papers of*  
589 *a mathematical and physical character* 115 (772) (1927) 700–721.  
590 URL <https://royalsocietypublishing.org/doi/pdf/10.1098/rspa.1927.0118>
- 591 [21] M. T. Anguloa, J. X. Velasco-Hernandez, [Robust qualitative estimation of time-](#)  
592 [varying contact rates in uncertain epidemics](#), *Epidemics* 24 (2018) 98–104.  
593 URL <https://doi.org/10.1016/j.epidem.2018.03.001>
- 594 [22] N. G. Becker, K. Glass, B. Barnes, P. Caley, D. Philp, J. McCaw, J. McVernon,  
595 J. Wood, [Using Mathematical Models to Assess Responses to an Outbreak of an](#)  
596 [Emerged Viral Respiratory Disease](#), Final Report to the Australian Government De-  
597 partment of Health and Ageing. National Centre for Epidemiology and Population  
598 Health, Australian National University (April 2006).  
599 URL [https://www1.health.gov.au/internet/publications/publishing.nsf/](https://www1.health.gov.au/internet/publications/publishing.nsf/Content/mathematical-models)  
600 [Content/mathematical-models](#)
- 601 [23] J. Hwang, H. Park, J. Jung, S.-H. Kim, N. Kim, [Basic and effective reproduction](#)  
602 [numbers of COVID-19 cases in South Korea excluding Sincheonji cases](#), medRxiv  
603 (January 2020).  
604 URL [http://medrxiv.org/content/early/2020/03/31/](http://medrxiv.org/content/early/2020/03/31/2020.03.19.20039347.abstract)  
605 [2020.03.19.20039347.abstract](#)
- 606 [24] W. H. Organization, et al., [Report of the WHO–China Joint Mission on Coronavirus](#)  
607 [Disease 2019 \(COVID-19\)](#), 16–24 February 2020 (February 2020).  
608 URL [https://www.who.int/docs/default-source/coronaviruse/who-china-](https://www.who.int/docs/default-source/coronaviruse/who-china-joint-mission-on-covid-19-final-report.pdf)  
609 [joint-mission-on-covid-19-final-report.pdf](#)
- 610 [25] G. Frasso, P. Lambert, [Bayesian inference in an extended SEIR model with nonpara-](#)  
611 [metric disease transmission rate: an application to the ebola epidemic in sierra leone](#),

- 612 Biostatistics 17 (4) (2019) 779–792.  
613 URL <https://doi.org/10.1093/biostatistics/kxw027>
- 614 [26] X. Xu, T. Kypraios, P. O’Neill, [Bayesian non-parametric inference for stochastic](#)  
615 [epidemic models using Gaussian Processes](#), Biostatistics 17 (4) (2016) 619–633.  
616 URL <https://doi.org/10.1093/biostatistics/kxw011>
- 617 [27] World Health Organization, [Coronavirus disease 2019 \(COVID-19\) Situation Report](#)  
618 [73](#) (April 2020).  
619 URL [https://www.who.int/docs/default-source/coronaviruse/situation-](https://www.who.int/docs/default-source/coronaviruse/situation-reports/20200402-sitrep-73-covid-19.pdf)  
620 [reports/20200402-sitrep-73-covid-19.pdf](#)
- 621 [28] E. Petersen, M. Koopmans, U. Go, D. H. Hamer, N. Petrosillo, F. Castelli,  
622 M. Storgaard, S. Al Khalili, L. Simonsen, [Comparing SARS-CoV-2 with SARS-CoV](#)  
623 [and influenza pandemics](#), The Lancet infectious diseases (2020).  
624 URL [https://www.thelancet.com/pdfs/journals/laninf/PIIS1473-](https://www.thelancet.com/pdfs/journals/laninf/PIIS1473-3099(20)30484-9.pdf)  
625 [3099\(20\)30484-9.pdf](#)
- 626 [29] Emil Zainul, [Malaysia to boost virus testing with S Korean test kits](#), Accessed: 2020-  
627 07-21 (2020).  
628 URL [https://www.theedgemarkets.com/article/malaysia-boost-virus-](https://www.theedgemarkets.com/article/malaysia-boost-virus-testing-s-korean-test-kits)  
629 [testing-s-korean-test-kits](#)
- 630 [30] J. A. Backer, D. Klinkenberg, J. Wallinga, Incubation period of 2019 novel coron-  
631 avirus (2019-nCoV) infections among travellers from Wuhan, China, 20–28 January  
632 2020, Eurosurveillance 25 (5) (2020) 2000062.
